# Supplementary material
Source: PubMed Central journal article supplement (PMC5714753)
Supplement: ajcr0007-2245-f6.pdf [file ajcr0007-2245-f6.pdf]

## Propafenone is a novel therapeutic option in ESCC

**Supplementary Table 1.** Differently expressed proteins in the propafenone-treated KYSE270 cells

| Protein name    | Accession ID | Fold change | P value     |
|-----------------|--------------|-------------|-------------|
| ILVBL           | A1LOT0       | 0.597204757 | 0.036947481 |
| NBAS            | A2RRP1       | 2.209296148 | 0.019374062 |
| C5orf51         | A6NDU8       | 1.625030904 | 0.045963558 |
| TUBAL3          | A6NHL2       | 0.280062216 | 0.00037299  |
| UNC119B         | A6NIH7       | 1.632852882 | 0.043325473 |
| SNRPGP15; SNRPG | A8MWD9       | 2.274000834 | 0.004180064 |
| NACA            | E9PAV3       | 1.504809488 | 0.013034655 |
| MYL3            | 000249       | 1.383725376 | 0.007416935 |
| PDLIM1          | 000151       | 0.58282821  | 0.010347981 |
| SNAP23          | 000161       | 2.89369575  | 0.035492676 |
| STXBP3          | 000186       | 1.564661142 | 0.010582351 |
| NDUFS8          | 000217       | 0.48428277  | 0.016222937 |
| PGRMC1          | 000264       | 1.511080312 | 0.022943909 |
| CLIC1           | 000299       | 0.713507066 | 0.023449804 |
| GOLIM4          | 000461       | 2.010094306 | 0.048735977 |
| NDUFA4          | 000483       | 1.342147611 | 0.04639657  |
| NOP56           | 000567       | 0.646526125 | 0.042819578 |
| PIR             | 000625       | 1.539328849 | 0.017357628 |
| MAN2B1          | 000754       | 1.814265116 | 0.003499821 |
| AP3D1           | 014617       | 0.251805428 | 0.020301536 |
| PDCD5           | 014737       | 2.060071063 | 0.002526617 |
| MGST3           | 014880       | 0.120912411 | 0.013331904 |
| HNRNPDL         | 014979       | 1.799337501 | 0.033340479 |
| XPO1            | 014980       | 0.684502015 | 0.00193069  |
| SEC16A          | 015027       | 0.150246376 | 0.041654877 |
| PFAS            | 015067       | 1.507456789 | 0.01620293  |
| NPC1            | 015118       | 1.762024212 | 0.032301536 |
| PGRMC2          | 015173       | 1.400770655 | 0.033346195 |
| PFDN6           | 015212       | 1.505945256 | 0.008797428 |
| STX7            | 015400       | 2.22570502  | 0.03117542  |
| CD3EAP          | 015446       | 0.462194232 | 0.048298678 |
| TTI1            | 043156       | 1.667371864 | 0.031008217 |
| PHGDH           | 043175       | 1.320773874 | 0.018806717 |
| ERI3            | 043414       | 2.219502212 | 0.016896034 |
| PPIH            | 043447       | 1.922835585 | 0.027664166 |
| GSTZ1           | 043708       | 0.601266266 | 0.014233655 |
| ENSA            | 043768       | 0.453819915 | 0.022420865 |
| AKAP8           | 043823       | 1.980386849 | 0.003596999 |
| TIMM8A          | 060220       | 3.18812249  | 0.045627724 |
| KDM1A           | 060341       | 1.546795463 | 0.009782065 |
| RANBP6          | 060518       | 0.542698325 | 0.011964273 |
| ATP6V1G1        | 075348       | 1.945127172 | 0.01948696  |
| SH3BGRL         | 075368       | 1.98239447  | 0.00706681  |
| BANF1           | 075531       | 2.25354579  | 0.013423365 |
| RPS6KA4         | 075676       | 1.8548738   | 0.012380136 |
| ADAP1; ADAP2    | 075689       | 0.427690778 | 0.030478028 |
| RP2             | 075695       | 0.476063938 | 0.027684173 |
| DNAJC8          | 075937       | 1.95446511  | 0.044791711 |
| CPD             | 075976       | 0.610620692 | 0.048608789 |
| MYO1D           | 094832       | 1.654570873 | 0.029390497 |
| AKR7A3          | 095154       | 1.531201701 | 0.03657592  |
| RTN3            | 095197       | 1.377274732 | 0.018806717 |
| SMC2            | 095347       | 0.526608944 | 0.021643444 |

## Propafenone is a novel therapeutic option in ESCC

|                                                                                   |        |             |             |
|-----------------------------------------------------------------------------------|--------|-------------|-------------|
| ETHE1                                                                             | O95571 | 1.730521346 | 0.025674884 |
| TXNDC12                                                                           | O95881 | 1.711198276 | 0.04701965  |
| MT-CO2                                                                            | P00403 | 0.66675259  | 0.018776706 |
| PLG                                                                               | P00747 | 1.788413754 | 0.004876027 |
| KRT14                                                                             | P02533 | 2.433133867 | 0.008608789 |
| KRT6A                                                                             | P02538 | 1.794507151 | 0.021243301 |
| APOE                                                                              | P02649 | 1.357651801 | 0.030052161 |
| APOC3                                                                             | P02656 | 1.423184685 | 0.006347981 |
| RBP4                                                                              | P02753 | 0.501371518 | 0.026989639 |
| GC                                                                                | P02774 | 0.771783301 | 0.021107538 |
| TFRC                                                                              | P02786 | 0.675832805 | 0.00611647  |
| LTF                                                                               | P02788 | 0.762368635 | 0.001903537 |
| VTN                                                                               | P04004 | 0.584298999 | 0.036665952 |
| ALDOA                                                                             | P04075 | 1.277895108 | 0.021424795 |
| PRNP                                                                              | P04156 | 1.825018251 | 0.008141479 |
| KRT6B                                                                             | P04259 | 1.736525489 | 0.013923544 |
| KRT1                                                                              | P04264 | 1.581041776 | 0.001669168 |
| TUBB4A                                                                            | P04350 | 2.746928476 | 0.041013219 |
| HIST1H2AB; HIST1H2AC; HIST1H2AD; HIST1H2AH; HIST1H2AJ; HIST1H2AG; HIST3H2A; H2AFJ | P04908 | 0.804353113 | 0.035156842 |
| SLC25A5                                                                           | P05141 | 0.805236718 | 0.014323687 |
| PCCB                                                                              | P05166 | 2.257046215 | 0.015172562 |
| EIF2S1                                                                            | P05198 | 0.680264152 | 0.027262594 |
| HMGN2                                                                             | P05204 | 1.988105282 | 0.00309682  |
| RPLP2                                                                             | P05387 | 2.069940457 | 0.023801358 |
| SERPINA7                                                                          | P05543 | 0.678853276 | 0.037666309 |
| TPM3                                                                              | P06753 | 1.238854528 | 0.012493033 |
| CTSD                                                                              | P07339 | 0.611118715 | 0.021496249 |
| CTSL                                                                              | P07711 | 1.854454956 | 0.00560343  |
| PFN1                                                                              | P07737 | 1.678034693 | 0.007969989 |
| CYC1                                                                              | P08574 | 1.757080876 | 0.034720972 |
| KRT16                                                                             | P08779 | 5.306537989 | 0.002143623 |
| CD63                                                                              | P08962 | 0.256623319 | 0.001766345 |
| SRP19                                                                             | P09132 | 1.620931618 | 0.029892104 |
| HMGB1                                                                             | P09429 | 1.432385715 | 0.022529475 |
| HNRNPA1                                                                           | P09651 | 1.548785771 | 0.013541979 |
| UCHL1                                                                             | P09936 | 1.34959109  | 0.030965345 |
| LAMP1                                                                             | P11279 | 1.332969578 | 0.033947839 |
| ADH5                                                                              | P11766 | 0.694265823 | 0.034110754 |
| PABPC1                                                                            | P11940 | 1.321489759 | 0.043931404 |
| TPR                                                                               | P12270 | 0.651632588 | 0.04054448  |
| CKMT1A                                                                            | P12532 | 0.330314323 | 0.00133905  |
| LAMP2                                                                             | P13473 | 1.355765563 | 0.036943194 |
| MTHFD2                                                                            | P13995 | 1.999652794 | 0.008118614 |
| MIF                                                                               | P14174 | 2.612744466 | 0.000190068 |
| SNRNP; SNRPN                                                                      | P14678 | 1.398736926 | 0.036214362 |
| UQCRB                                                                             | P14927 | 3.270231798 | 0.003985709 |
| NQO1                                                                              | P15559 | 1.299519409 | 0.04831154  |
| ACADS                                                                             | P16219 | 2.072695582 | 0.019869954 |
| HIST1H1B                                                                          | P16401 | 1.220900441 | 0.032408717 |
| YBX3                                                                              | P16989 | 0.629240666 | 0.031082529 |
| HSPA6                                                                             | P17066 | 1.508608068 | 0.002579493 |
| PRKCA                                                                             | P17252 | 1.825803742 | 0.047748482 |
| RPL35A                                                                            | P18077 | 1.369335281 | 0.041799214 |
| ATP5J                                                                             | P18859 | 2.089981982 | 0.012841729 |
| XRCC1                                                                             | P18887 | 0.620724166 | 0.041434798 |
| EIF2S2                                                                            | P20042 | 1.515215054 | 0.022413719 |
| BTF3                                                                              | P20290 | 1.43737354  | 0.04093462  |

## Propafenone is a novel therapeutic option in ESCC

|                                                       |        |             |             |
|-------------------------------------------------------|--------|-------------|-------------|
| PSMB1                                                 | P20618 | 0.762851349 | 0.043982851 |
| M6PR                                                  | P20645 | 1.531626592 | 0.038062165 |
| PTMS                                                  | P20962 | 2.73955042  | 0.006002144 |
| NME2                                                  | P22392 | 1.561694603 | 0.006633798 |
| FDXR                                                  | P22570 | 1.649591125 | 0.01578135  |
| HNRNPA2B1                                             | P22626 | 1.487821904 | 0.020250089 |
| PPIB                                                  | P23284 | 1.347159768 | 0.02136906  |
| GCSH                                                  | P23434 | 1.501727462 | 0.03732333  |
| EEF1B2                                                | P24534 | 1.303162958 | 0.041956413 |
| ATP5F1                                                | P24539 | 0.523667796 | 0.014109325 |
| ACP1                                                  | P24666 | 1.435917782 | 0.026955341 |
| RPS12                                                 | P25398 | 3.199511614 | 0.001969275 |
| PSMA1                                                 | P25786 | 1.584276238 | 0.022192212 |
| CTNNA2                                                | P26232 | 0.450834305 | 0.008577349 |
| EEF1G                                                 | P26641 | 0.793426015 | 0.041954984 |
| FKBP2                                                 | P26885 | 1.613432756 | 0.026843873 |
| RPL10                                                 | P27635 | 1.389432697 | 0.026720972 |
| RPA1                                                  | P27694 | 0.665464512 | 0.039552697 |
| ABCD3                                                 | P28288 | 0.582966896 | 0.027209718 |
| GRN                                                   | P28799 | 0.177837389 | 0.001363344 |
| S100A2                                                | P29034 | 0.821989148 | 0.032315827 |
| ERP29                                                 | P30040 | 1.363286611 | 0.033121829 |
| C21 or f33                                            | P30042 | 2.102385911 | 0.009300464 |
| PRDX5                                                 | P30044 | 1.453040322 | 0.033404787 |
| ATP5D                                                 | P30049 | 1.765283064 | 0.010050732 |
| CMPK1                                                 | P30085 | 1.495495038 | 0.036971776 |
| PEBP1                                                 | P30086 | 1.705337441 | 0.012322972 |
| STIP1                                                 | P31948 | 1.313010603 | 0.034952483 |
| PRDX2                                                 | P32119 | 1.243743836 | 0.04831154  |
| DUT                                                   | P33316 | 1.687447471 | 0.024836013 |
| HIST1H2BB; HIST1H2BJ; HIST1H2BO; HIST2H2BE; HIST3H2BB | P33778 | 1.548066941 | 0.008160057 |
| GPC1                                                  | P35052 | 0.678337727 | 0.049221865 |
| RPL22                                                 | P35268 | 1.312547419 | 0.030616649 |
| KRT9                                                  | P35527 | 1.842915011 | 0.016976063 |
| KRT2                                                  | P35908 | 1.422637313 | 0.0376806   |
| ATP6V1E1                                              | P36543 | 1.973623876 | 0.005294748 |
| LONP1                                                 | P36776 | 4.52559771  | 0.002022151 |
| TAGLN2                                                | P37802 | 1.260832245 | 0.044228653 |
| RBMX                                                  | P38159 | 2.003446267 | 0.011895677 |
| CAPG                                                  | P40121 | 1.977481118 | 0.008657378 |
| NAA10                                                 | P41227 | 2.144790108 | 0.015709896 |
| RPS27                                                 | P42677 | 0.6887122   | 0.029806359 |
| CDKN2A; CDKN2B                                        | P42771 | 3.37451866  | 0.004533048 |
| PPIC                                                  | P45877 | 1.416885233 | 0.048490175 |
| CRK                                                   | P46108 | 2.01583502  | 0.01758771  |
| CRKL                                                  | P46109 | 1.633632639 | 0.030903894 |
| NSF                                                   | P46459 | 1.664074653 | 0.016088603 |
| RPL21                                                 | P46778 | 1.305730245 | 0.049406217 |
| RPS9                                                  | P46781 | 0.644217635 | 0.007895677 |
| CAPZA2                                                | P47755 | 1.591709642 | 0.032397285 |
| EIF1AX                                                | P47813 | 1.377284396 | 0.034953912 |
| RPL29                                                 | P47914 | 0.623992328 | 0.006966774 |
| PSMD8                                                 | P48556 | 1.508076506 | 0.039129689 |
| PRRC2A                                                | P48634 | 0.449461539 | 0.028555913 |
| CD97                                                  | P48960 | 0.602108454 | 0.040714541 |
| RPL34                                                 | P49207 | 1.551491871 | 0.023165416 |

## Propafenone is a novel therapeutic option in ESCC

|                                                                                                  |        |             |             |
|--------------------------------------------------------------------------------------------------|--------|-------------|-------------|
| RPIA                                                                                             | P49247 | 0.614497549 | 0.044384423 |
| MCM2                                                                                             | P49736 | 2.131229646 | 0.004758842 |
| MRE11A                                                                                           | P49959 | 4.131123895 | 0.000733119 |
| PPT1                                                                                             | P50897 | 0.369037746 | 0.003435513 |
| ALDH3A2                                                                                          | P51648 | 0.602481241 | 0.034769561 |
| ARHGDI1                                                                                          | P52566 | 1.886594915 | 0.015912826 |
| NUBP1                                                                                            | P53384 | 1.817784526 | 0.033330475 |
| SUB1                                                                                             | P53999 | 1.948370368 | 0.004936049 |
| AK2                                                                                              | P54819 | 1.471748999 | 0.033576277 |
| NAP1L1                                                                                           | P55209 | 0.725705527 | 0.026483744 |
| CASP7                                                                                            | P55210 | 0.365729079 | 0.006669525 |
| ATP5I                                                                                            | P56385 | 1.799921164 | 0.013098964 |
| C21 or f59                                                                                       | P57076 | 0.220235112 | 0.004344409 |
| RAB25                                                                                            | P57735 | 0.330946859 | 0.007179707 |
| SEC61G                                                                                           | P60059 | 0.701818018 | 0.014765273 |
| TPI1                                                                                             | P60174 | 1.293219049 | 0.025594855 |
| MYL6                                                                                             | P60660 | 1.310125679 | 0.045184709 |
| S100A10                                                                                          | P60903 | 1.457229549 | 0.011647017 |
| GMFB                                                                                             | P60983 | 1.54681555  | 0.027214005 |
| RAB10                                                                                            | P61026 | 1.619004881 | 0.016475884 |
| RPL26                                                                                            | P61254 | 1.579103452 | 0.012931761 |
| PCBD1                                                                                            | P61457 | 3.547328819 | 0.004744552 |
| RPL37A                                                                                           | P61513 | 2.382762002 | 0.005299035 |
| HSPE1                                                                                            | P61604 | 1.97646982  | 0.004883173 |
| B2M                                                                                              | P61769 | 1.39933099  | 0.042502322 |
| COPZ1                                                                                            | P61923 | 0.701032522 | 0.027158271 |
| RPS18                                                                                            | P62269 | 1.428301616 | 0.014668096 |
| RPS11                                                                                            | P62280 | 1.738904003 | 0.00451304  |
| SNRPF                                                                                            | P62306 | 1.393997933 | 0.045341908 |
| SNRPD1                                                                                           | P62314 | 0.739131846 | 0.036180064 |
| ACTA2; ACTG2                                                                                     | P62736 | 0.769646958 | 0.013772061 |
| RPL23A                                                                                           | P62750 | 0.666922507 | 0.017091819 |
| VSNL1                                                                                            | P62760 | 0.619471039 | 0.042436584 |
| HIST1H2BC; HIST1H2BD; HIST1H2BH; HIST1H2BK; HIST1H2BL; HIST1H2BM; HIST1H2BN;<br>HIST2H2BF; H2BFS | P62807 | 1.581880487 | 0.013126116 |
| RAN                                                                                              | P62826 | 1.194672516 | 0.047514112 |
| UBE2D2; UBE2D3                                                                                   | P62837 | 1.496288538 | 0.03458378  |
| RPS15                                                                                            | P62841 | 0.716065378 | 0.02683244  |
| FAU                                                                                              | P62861 | 0.766825081 | 0.031531261 |
| RPL31                                                                                            | P62899 | 0.783012774 | 0.041889246 |
| RPL32                                                                                            | P62910 | 1.48742485  | 0.016474455 |
| RPL8                                                                                             | P62917 | 1.483689689 | 0.020760272 |
| PPIA                                                                                             | P62937 | 1.735846099 | 0.00155627  |
| GRB2                                                                                             | P62993 | 1.651421843 | 0.025903537 |
| TRA2B                                                                                            | P62995 | 1.573684139 | 0.025719185 |
| RPL38                                                                                            | P63173 | 1.792038708 | 0.048440157 |
| UBE2L3                                                                                           | P68036 | 2.133746055 | 0.006155055 |
| TUBA4A                                                                                           | P68366 | 0.806320654 | 0.0294791   |
| HIST1H3A                                                                                         | P68431 | 0.399513167 | 0.005434798 |
| HBA1                                                                                             | P69905 | 1.259840395 | 0.027504109 |
| IGBP1                                                                                            | P78318 | 0.518169874 | 0.029423365 |
| RAE1                                                                                             | P78406 | 2.261726428 | 0.012577349 |
| ERH                                                                                              | P84090 | 2.154482779 | 0.014931047 |
| H3F3A                                                                                            | P84243 | 0.695915059 | 0.039975706 |
| PURA                                                                                             | Q00577 | 1.698496472 | 0.022442301 |
| FABP5                                                                                            | Q01469 | 2.306826102 | 0.004441586 |

## Propafenone is a novel therapeutic option in ESCC

|         |        |             |             |
|---------|--------|-------------|-------------|
| IFITM3  | Q01628 | 1.832179432 | 0.011801358 |
| SLC7A5  | Q01650 | 0.691605278 | 0.030216506 |
| DR1     | Q01658 | 1.712369158 | 0.020811718 |
| BDH1    | Q02338 | 1.80656764  | 0.036914612 |
| CAV1    | Q03135 | 0.486187088 | 0.007745623 |
| TAP2    | Q03519 | 0.547761661 | 0.015412647 |
| KRT17   | Q04695 | 1.820651601 | 0.033393355 |
| GLO1    | Q04760 | 1.493503889 | 0.014682387 |
| PLP2    | Q04941 | 2.27817697  | 0.004873169 |
| SRSF11  | Q05519 | 0.70357139  | 0.048548767 |
| EEF1A2  | Q05639 | 0.694166653 | 0.018245088 |
| PTPN11  | Q06124 | 0.125229704 | 0.000714541 |
| FMR1    | Q06787 | 1.755561162 | 0.02963487  |
| DDR1    | Q08345 | 0.48213341  | 0.037822079 |
| GOLGA2  | Q08379 | 1.866602161 | 0.037153269 |
| PPID    | Q08752 | 1.592542456 | 0.033341908 |
| ASPH    | Q12797 | 0.61603182  | 0.002622365 |
| CSTF3   | Q12996 | 0.580409511 | 0.009048946 |
| FLII    | Q13045 | 0.599040727 | 0.036587353 |
| GPS1    | Q13098 | 0.607043208 | 0.030652376 |
| PRDX4   | Q13162 | 0.71957984  | 0.04493319  |
| SRSF6   | Q13247 | 1.653226765 | 0.015172562 |
| G3BP1   | Q13283 | 1.390795317 | 0.03984423  |
| IFIT5   | Q13325 | 0.56400687  | 0.020605931 |
| SQSTM1  | Q13501 | 1.556059611 | 0.039282601 |
| PIN1    | Q13526 | 2.317035367 | 0.033429082 |
| CUL4B   | Q13620 | 2.135339636 | 0.010375134 |
| CBFB    | Q13951 | 1.979178651 | 0.022400857 |
| COTL1   | Q14019 | 0.583545496 | 0.024423008 |
| TRIM29  | Q14134 | 1.59866776  | 0.014482315 |
| SCRIB   | Q14160 | 2.626115659 | 0.037046088 |
| MLEC    | Q14165 | 2.167152619 | 0.013128975 |
| MAP7    | Q14244 | 0.493916459 | 0.006745266 |
| GNA13   | Q14344 | 0.721194401 | 0.019925688 |
| WFDC2   | Q14508 | 0.379547691 | 0.028310111 |
| LAGE3   | Q14657 | 0.556770311 | 0.042092176 |
| PPP2R5D | Q14738 | 0.456794396 | 0.042938192 |
| LBR     | Q14739 | 0.611036338 | 0.005622008 |
| CASP8   | Q14790 | 0.621315134 | 0.022313683 |
| NAA25   | Q14CX7 | 0.619740446 | 0.03922115  |
| ARL6IP1 | Q15041 | 2.220937542 | 0.040507324 |
| EIF4H   | Q15056 | 1.315331085 | 0.013240443 |
| RAB35   | Q15286 | 0.720496742 | 0.036754555 |
| DHCR24  | Q15392 | 0.642257732 | 0.029959271 |
| CNN3    | Q15417 | 1.471921899 | 0.038450875 |
| SF3A2   | Q15428 | 1.67062798  | 0.043189711 |
| MAPRE2  | Q15555 | 0.678641186 | 0.039788496 |
| TRAM1   | Q15629 | 0.486231622 | 0.028191497 |
| MAPRE1  | Q15691 | 0.732478216 | 0.020853162 |
| ADRM1   | Q16186 | 0.682465782 | 0.044315827 |
| CCDC6   | Q16204 | 1.997910159 | 0.036180064 |
| BAK1    | Q16611 | 0.411664146 | 0.025864952 |
| NDUFA5  | Q16718 | 1.785155729 | 0.009173276 |
| HADH    | Q16836 | 0.641726315 | 0.025547696 |
| UGT8    | Q16880 | 0.458017925 | 0.027759914 |
| ERCC6L  | Q2NKX8 | 0.614217143 | 0.032831726 |

## Propafenone is a novel therapeutic option in ESCC

|                |        |             |             |
|----------------|--------|-------------|-------------|
| UAP1L1         | Q3KQV9 | 2.642838731 | 0.041639157 |
| CCDC58         | Q4VC31 | 1.573017508 | 0.013168989 |
| USP39          | Q53GS9 | 0.630245846 | 0.041859235 |
| COQ5           | Q5HYK3 | 0.528776027 | 0.023599857 |
| AARS2          | Q5JTZ9 | 1.76886134  | 0.014040729 |
| NUP188         | Q5SRE5 | 0.515095581 | 0.023761343 |
| UBR4           | Q5T4S7 | 0.422970459 | 0.021756342 |
| RBM26          | Q5T8P6 | 1.713352319 | 0.009048946 |
| EMC10          | Q5UCC4 | 2.49329507  | 0.026262237 |
| PRPF38B        | Q5VTL8 | 0.268707392 | 0.011021079 |
| ARHGAP17       | Q68EM7 | 1.607933463 | 0.003451233 |
| AGTRAP         | Q6RW13 | 0.679421189 | 0.032567345 |
| HIST2H3A       | Q71DI3 | 0.550102049 | 0.04493319  |
| HS2ST1         | Q7LGA3 | 1.559412258 | 0.024110039 |
| ATG9A          | Q7Z3C6 | 0.576747588 | 0.042652376 |
| CLASP1         | Q7Z460 | 0.390527543 | 0.038239371 |
| HDDC2          | Q7Z4H3 | 2.28231198  | 0.007379778 |
| KIF21A         | Q7Z4S6 | 0.561783427 | 0.013923544 |
| LSR            | Q86X29 | 1.910574479 | 0.0196413   |
| PHF6           | Q8IWS0 | 0.48224863  | 0.038216506 |
| DNAJC10        | Q8IXB1 | 1.715991482 | 0.012648803 |
| SRRM1          | Q8IYB3 | 0.304331396 | 0.045719185 |
| VKORC1L1       | Q8N0U8 | 0.457582146 | 0.004785995 |
| EHBP1L1        | Q8N3D4 | 0.461607135 | 0.007599857 |
| CISD2          | Q8N5K1 | 1.666522392 | 0.022578064 |
| SUMF2          | Q8NBJ7 | 0.697408789 | 0.037077528 |
| SPC24          | Q8NBT2 | 0.40890974  | 0.042603787 |
| NUP37          | Q8NFB4 | 0.62976347  | 0.005497678 |
| ATL2           | Q8NHH9 | 1.682674442 | 0.039399786 |
| THOC2          | Q8NI27 | 1.957103562 | 0.035189711 |
| FAM213B        | Q8TBF2 | 1.711182335 | 0.034656663 |
| TBC1D15        | Q8TC07 | 0.461449244 | 0.049106109 |
| NUP210         | Q8TEM1 | 0.659959649 | 0.013729189 |
| ZC3H15         | Q8WU90 | 2.167342366 | 0.04094891  |
| CHMP7          | Q8WUX9 | 0.643026658 | 0.013423365 |
| NUDCD2         | Q8WVJ2 | 1.633552166 | 0.048658807 |
| GATAD2B        | Q8WXI9 | 1.890257161 | 0.033056091 |
| CTNBL1         | Q8WYA6 | 0.425865703 | 0.033956413 |
| MRPS31         | Q92665 | 0.595537621 | 0.01912826  |
| AKAP1          | Q92667 | 4.052363138 | 0.041327617 |
| PRCC           | Q92733 | 0.340050389 | 0.010387996 |
| OSTF1          | Q92882 | 1.548973548 | 0.009579135 |
| GPKOW          | Q92917 | 1.817726337 | 0.037894962 |
| RAB8B          | Q92930 | 1.935728256 | 0.039568417 |
| LPP            | Q93052 | 0.637415918 | 0.027306895 |
| TSR2           | Q969E8 | 0.471974864 | 0.047215434 |
| UBE2E3; UBE2E2 | Q969T4 | 0.656143355 | 0.005912111 |
| PSMG2          | Q969U7 | 0.575925545 | 0.033939264 |
| TBRG4          | Q969Z0 | 0.626092091 | 0.02502751  |
| FAM162A        | Q96A26 | 0.638288742 | 0.027029653 |
| CCDC124        | Q96CT7 | 1.533771004 | 0.03246731  |
| NMD3           | Q96D46 | 0.690575344 | 0.042266524 |
| HOOK2          | Q96ED9 | 0.370125443 | 0.043056806 |
| CCDC126        | Q96EE4 | 1.911964327 | 0.019039657 |
| SAAL1          | Q96ER3 | 1.787402313 | 0.036060021 |
| PTCD3          | Q96EY7 | 0.673224371 | 0.028503037 |

## Propafenone is a novel therapeutic option in ESCC

|             |        |             |             |
|-------------|--------|-------------|-------------|
| EDC3        | Q96F86 | 0.590181358 | 0.039737049 |
| SCRN2       | Q96FV2 | 1.757424027 | 0.004       |
| REEP6       | Q96HR9 | 1.941303951 | 0.037754912 |
| PGAM5       | Q96HS1 | 0.683465377 | 0.01849089  |
| SUCLG2      | Q96I99 | 2.170255172 | 0.041329046 |
| ITCH        | Q96J02 | 0.65281696  | 0.009274741 |
| CDK5RAP3    | Q96JB5 | 3.557821539 | 0.048254377 |
| NACC1       | Q96RE7 | 0.43383782  | 0.0014005   |
| MYADM       | Q96S97 | 0.538674021 | 0.036142908 |
| PSMB7       | Q99436 | 1.380119284 | 0.028724544 |
| CNN2        | Q99439 | 1.624708259 | 0.049096106 |
| PFDN5       | Q99471 | 1.722927384 | 0.02667667  |
| PARK7       | Q99497 | 1.766714039 | 0.014403716 |
| EYA3        | Q99504 | 0.518837863 | 0.010550911 |
| SORT1       | Q99523 | 0.645192719 | 0.040896034 |
| LGMN        | Q99538 | 0.626474159 | 0.049970704 |
| TXN2        | Q99757 | 3.060058745 | 0.029411933 |
| SLC29A1     | Q99808 | 2.494742607 | 0.010172204 |
| ARPC5L      | Q9BPX5 | 1.505899327 | 0.021376206 |
| MACROD1     | Q9BQ69 | 3.839311592 | 0.049319043 |
| WDR77       | Q9BQA1 | 0.665041712 | 0.006269382 |
| TXNDC17     | Q9BRA2 | 2.5833483   | 0.031172562 |
| C7 or f50   | Q9BRJ6 | 0.528770257 | 0.004573062 |
| TMEM70      | Q9BUB7 | 0.590793721 | 0.007512683 |
| EMC6        | Q9BV81 | 1.827094128 | 0.013098964 |
| SARG        | Q9BW04 | 0.499615837 | 0.005294748 |
| LSM14B      | Q9BX40 | 1.646368673 | 0.035152554 |
| HINT2       | Q9BX68 | 2.661455112 | 0.043415506 |
| OSBPL10     | Q9BXB5 | 0.561528262 | 0.011371204 |
| AP1M1       | Q9BXS5 | 1.463659495 | 0.014993926 |
| NUSAP1      | Q9BXS6 | 0.371339805 | 0.042845302 |
| C14 or f142 | Q9BXV9 | 2.230572575 | 0.049480529 |
| GNB1L       | Q9BYB4 | 1.550593325 | 0.014610932 |
| NLN         | Q9BYT8 | 0.402398158 | 0.032951768 |
| MRPL37      | Q9BZE1 | 0.645585322 | 0.006333691 |
| UBL5        | Q9BZL1 | 3.52100151  | 0.039955698 |
| WDR12       | Q9GZL7 | 0.554096056 | 0.003614148 |
| TMEM126A    | Q9H061 | 1.69643643  | 0.031861379 |
| RAB6C       | Q9H0N0 | 0.304524939 | 0.046639514 |
| NUCKS1      | Q9H1E3 | 1.750213512 | 0.008810289 |
| MRPL46      | Q9H2W6 | 0.448346249 | 0.048717399 |
| POFUT1      | Q9H488 | 1.528882258 | 0.014440872 |
| PIGU        | Q9H490 | 1.503255744 | 0.034155055 |
| RANBP3      | Q9H6Z4 | 0.543227789 | 0.038663809 |
| C17orf75    | Q9HAS0 | 1.514775313 | 0.0282801   |
| RDH14       | Q9HBH5 | 0.552106499 | 0.042072169 |
| DYNLRB1     | Q9NP97 | 1.824178038 | 0.034946767 |
| ISYNA1      | Q9NPH2 | 0.728736336 | 0.021934977 |
| RTN4        | Q9NQC3 | 0.654375077 | 0.047485531 |
| POLE3       | Q9NRF9 | 1.576072077 | 0.021902108 |
| UBQLN4      | Q9NRR5 | 0.426906548 | 0.037942122 |
| HEBP1       | Q9NRV9 | 2.19908934  | 0.01402358  |
| PLSCR3      | Q9NRY6 | 70.91640158 | 0.009269025 |
| EXOC1       | Q9NV70 | 1.975464889 | 0.000364416 |
| UQCC1       | Q9NVA1 | 0.599346047 | 0.012161486 |
| EXD2        | Q9NVH0 | 0.586586996 | 0.030859593 |

## Propafenone is a novel therapeutic option in ESCC

|                          |        |             |             |
|--------------------------|--------|-------------|-------------|
| DNAJC11                  | Q9NVH1 | 0.573701998 | 0.035086817 |
| FANCI                    | Q9NVI1 | 0.518191217 | 0.018479457 |
| NDUFB11                  | Q9NX14 | 0.636394177 | 0.018136477 |
| CHCHD3                   | Q9NX63 | 1.586861462 | 0.033823508 |
| TVP23B                   | Q9NYZ1 | 2.692056958 | 0.039281172 |
| CISD1                    | Q9NZ45 | 2.076237056 | 0.009423365 |
| COQ3                     | Q9NZJ6 | 1.955198986 | 0.020838871 |
| EMC3                     | Q9P0I2 | 1.5137619   | 0.027278314 |
| NDUFA13                  | Q9P0J0 | 1.437136782 | 0.046257949 |
| PDP1                     | Q9P0J1 | 2.203864658 | 0.027381208 |
| ABRACL                   | Q9P1F3 | 2.201649215 | 0.005220436 |
| CAMSAP3                  | Q9P1Y5 | 0.528132175 | 0.006569489 |
| GMPR2                    | Q9P2T1 | 1.784573674 | 0.047394069 |
| METTL1                   | Q9UBP6 | 1.719813808 | 0.04740836  |
| PEF1                     | Q9UBV8 | 0.688813091 | 0.030946767 |
| SLC25A10                 | Q9UBX3 | 3.211806872 | 0.038995355 |
| PFDN2                    | Q9UHV9 | 2.633878402 | 0.011113969 |
| ENOPH1                   | Q9UHY7 | 0.659252626 | 0.00356413  |
| ATP6V1H                  | Q9UI12 | 0.5768089   | 0.046733834 |
| LCMT1                    | Q9UIC8 | 0.595976935 | 0.020272955 |
| LNPEP                    | Q9UIQ6 | 2.833265414 | 0.030429439 |
| VPS28                    | Q9UK41 | 1.583124894 | 0.014986781 |
| LSM7                     | Q9UK45 | 6.055300136 | 0.014659521 |
| G3BP2                    | Q9UN86 | 1.576626139 | 0.004565916 |
| EXOC6B                   | Q9Y2D4 | 1.810303672 | 0.038935334 |
| LAMTOR2                  | Q9Y2Q5 | 0.328242904 | 0.042336549 |
| POLDIP2                  | Q9Y2S7 | 0.637095107 | 0.00896463  |
| DHRS7                    | Q9Y394 | 0.611074274 | 0.031628439 |
| TMED5                    | Q9Y3A6 | 0.666981338 | 0.026252233 |
| FIS1                     | Q9Y3D6 | 1.999298753 | 0.024138621 |
| FBX07                    | Q9Y3I1 | 0.573348002 | 0.012157199 |
| RABGAP1                  | Q9Y3P9 | 0.58646577  | 0.029376206 |
| RPL36                    | Q9Y3U8 | 0.715158894 | 0.045289032 |
| MAP4K5                   | Q9Y4K4 | 3.069250543 | 0.013997856 |
| NPTN                     | Q9Y639 | 2.295002724 | 0.010949625 |
| SPCS1                    | Q9Y6A9 | 0.646490492 | 0.01184423  |
| MAD1L1                   | Q9Y6D9 | 0.61680975  | 0.039069668 |
| NDUFB9                   | Q9Y6M9 | 1.538444161 | 0.028707395 |
| UB2V1_HUMAN; UB2V2_HUMAN | Q13404 | 1.309435665 | 0.034535191 |
